# Supplementary material
Source: PubMed Central journal article supplement (PMC2441688)

## **Supplemental Information**

### **Supplemental Materials and Methods**

#### Strains and Plasmids

Standard methods were used for growth, sporulation, tetrad dissection and DNA manipulations and transformations of yeast. The yeast strains used in this study are listed in Table 1. The plasmids used in this study are listed in Table 2.

#### TCA precipitation

Mid-log phase cells were harvest and resuspended in 1 ml of 10% trichloroacetic acid (TCA) with 1 mM 4-(2-aminoethyl)benzenesulfonyl fluoride (AEBSF, a protease inhibitor), incubated on ice for 30 minutes, and precipitates were centrifuged at 14,000 rpm for 10 min at 4°C. Precipitates were washed twice with cold acetone, resuspended by sonication, and air-dried. Protein samples were processed for SDS-PAGE separation by adding 2X protein sample buffer with 0.1 mM AEBSF and solubilized by standard bead disruption.

#### SDS-PAGE and Immunoblotting

Proteins were separated on polyacrylamide mini gels (7.5-15%) at 18-25 mA in SDS running buffer (3mM SDS, 25 mM Tris base, 192 mM glycine) and then transferred onto nitrocellulose membranes at 80 V for 90 minutes in cold transfer buffer (20% methanol, 0.0375% SDS, 48 mM Tris base, 39 mM glycine). The membranes are blocked in 5% milk in TBST (10mM Tris, pH 7.5, 0.25 M NaCl, 0.025% Tween-20). Blots were incubated in the specified primary antibody, washed 3 times in TBST, incubated with secondary antibodies conjugated to HRP (Pierce, Rockford, IL) diluted 1:5000 in milk solution for 60 min. Blots were washed again 3 times in TBST, and then developed with Supersignal West Pico Chemiluminescent Substrate (Pierce, Rockford, IL) for 5 minutes at room temperature. The chemiluninescence was visualized on a Fluorochem 8000 Chemiluminescence System (Alpha Innotech Corp., San Leandro, CA).

### Ste3-GFP Localization Analysis

Cells were transformed with a STE3-GFP (URA) plasmid (pBW0639) (Urbanowski and Piper, 2001). For Ste3-GFP visualization, the pH of the culture was adjusted with 10 mM Tris, pH 7.5, 5 minutes before observation. The cells were then pelleted and resuspended in the same media at 2-5 OD/ml density and imaged. Ste3-GFP images were acquired with a Zeiss LSM 510 META confocal microscope equipped with the appropriate lasers and filter set.

### GFP-Ent1C-term Truncations Live-cell Imaging

GFP-Ent1C-term truncations images were collected with a 3i Marianas microscope (Intelligent Imaging Innovations, Denver, CO) equipped with an alpha Plan-Fluar 100x 1.46 NA objective and a Zeiss TIRF slider (Carl Zeiss, Thornwood, NY). Single color widefield GFP images were acquired using 488 nm laser excitation and a GFP dichroic and emission filter (Semrock, Rochester, NY). Slide-Book 4.2® software (Intelligent Imaging Innovations, Denver, CO) was used for image acquisition and dual channel image registration.

For live cell imaging, cells were grown to early log phase on rich medium plates at 30°C. Cells were placed in 200 µl minimal media on Concavalin A-coated 8 well Lab-Tek coverglass bottom dishes (Nalge Nunc, Rochester, NY). All imaging was at room temperature.

### Image Analysis

Image analysis was performed using the National Institute of Health ImageJ (<http://rsb.info.nih.gov/ij/>) or Slide-Book 4.2® software.

**Table1 Yeast Strains used in this study**

| <b>Strain</b> | <b>Genotype</b>                                                                                                                                                                                                              | <b>Source</b>     |
|---------------|------------------------------------------------------------------------------------------------------------------------------------------------------------------------------------------------------------------------------|-------------------|
| SEY6210       | <i>Mat<math>\alpha</math> leu2-3 ura3-52 his3-<math>\Delta</math>200 trp1-<math>\Delta</math>901 lys2-801 suc2-<math>\Delta</math>9</i>                                                                                      | Laboratory strain |
| BWY2497       | <i>Mata leu2-3 ura3-52 his3-<math>\Delta</math>200 trp1-<math>\Delta</math>901 lys2-801 suc2-<math>\Delta</math>9 bar1 ent1::LEU2 ent2::HIS3 yap1801::HIS3 yap1802::LEU2 + pBW0768 (ENT1, CEN)</i>                           | This study        |
| BWY2503       | <i>Mat<math>\alpha</math> leu2-3 ura3-52 his3-<math>\Delta</math>200 trp1-<math>\Delta</math>901 lys2-801 suc2-<math>\Delta</math>9 PAN1-GFP-KAN</i>                                                                         | This study        |
| BWY2506       | <i>Mat<math>\alpha</math> leu2-3 ura3-52 his3-<math>\Delta</math>200 trp1-<math>\Delta</math>901 lys2-801 suc2-<math>\Delta</math>9 ent1::LEU2 ent2::HIS3 PAN1-GFP-KAN + pBW0768 (ENT1, CEN)</i>                             | This study        |
| BWY2567       | <i>Mat<math>\alpha</math> leu2-3 ura3-52 his3-<math>\Delta</math>200 trp1-<math>\Delta</math>901 lys2-801 suc2-<math>\Delta</math>9 yap1801::HIS3 yap1802::LEU2</i>                                                          | Laboratory strain |
| BWY2571       | <i>Mat<math>\alpha</math> leu2-3 ura3-52 his3-<math>\Delta</math>200 trp1-<math>\Delta</math>901 lys2-801 suc2-<math>\Delta</math>9 ent1::LEU2 ent2::HIS3 yap1801::HIS3 yap1802::LEU2 ede1::KAN + pBW0053 (ENT2, CEN)</i>    | This study        |
| BWY2572       | <i>Mat<math>\alpha</math> leu2-3 ura3-52 his3-<math>\Delta</math>200 trp1-<math>\Delta</math>901 lys2-801 suc2-<math>\Delta</math>9 ent1::LEU2 ent2::HIS3 yap1801::HIS3 yap1802::LEU2 PAN1-GFP-KAN + pBW0768 (ENT1, CEN)</i> | This study        |
| BWY2574       | <i>Mata leu2-3 ura3-52 his3-<math>\Delta</math>200 trp1-<math>\Delta</math>901 lys2-801 suc2-<math>\Delta</math>9 bar1 ent1::LEU2 ent2::HIS3 yap1801::HIS3 yap1802::LEU2 ede1::KAN + pBW0768 (ENT1, CEN)</i>                 | This study        |
| BWY2594       | <i>Mat<math>\alpha</math> leu2-3 ura3-52 his3-<math>\Delta</math>200 trp1-<math>\Delta</math>901 lys2-801 suc2-<math>\Delta</math>9 ent1::LEU2 ent2::HIS3 + pBW0768 (ENT1, CEN)</i>                                          | Laboratory strain |
| BWY2595       | <i>Mat<math>\alpha</math> leu2-3 ura3-52 his3-<math>\Delta</math>200 trp1-<math>\Delta</math>901 lys2-801 suc2-<math>\Delta</math>9 ent1::LEU2 ent2::HIS3 + pBW0778 (ent1ENTH domain, CEN)</i>                               | Laboratory strain |
| BWY2596       | <i>Mat<math>\alpha</math> leu2-3 ura3-52 his3-<math>\Delta</math>200 trp1-<math>\Delta</math>901 lys2-801 suc2-<math>\Delta</math>9 ent1::LEU2 ent2::HIS3 yap1801::HIS3 yap1802::LEU2 + pBW0768 (ENT1, CEN)</i>              | This study        |
| BWY2597       | <i>Mat<math>\alpha</math> leu2-3 ura3-52 his3-<math>\Delta</math>200 trp1-<math>\Delta</math>901 lys2-801 suc2-<math>\Delta</math>9 ent1::LEU2 ent2::HIS3 yap1801::HIS3 yap1802::LEU2 + pBW0778 (ent1ENTH domain, CEN)</i>   | This study        |
| BWY2598       | <i>Mat<math>\alpha</math> leu2-3 ura3-52 his3-<math>\Delta</math>200 trp1-<math>\Delta</math>901</i>                                                                                                                         | This study        |

|         |                                                                                                                                                                            |            |
|---------|----------------------------------------------------------------------------------------------------------------------------------------------------------------------------|------------|
|         | <i>lys2-801 suc2-Δ9 ent1::LEU2 ent2::HIS3 yap1801::HIS3 yap1802::LEU2 + pBW0387 (ent1<sup>CBM-</sup>, CEN)</i>                                                             |            |
| BWY2599 | <i>Matα leu2-3 ura3-52 his3-Δ200 trp1-Δ901 lys2-801 suc2-Δ9 ent1::LEU2 ent2::HIS3 yap1801::HIS3 yap1802::LEU2 + pBW1375 (ent1<sup>UIM-</sup>, CEN)</i>                     | This study |
| BWY2600 | <i>Matα leu2-3 ura3-52 his3-Δ200 trp1-Δ901 lys2-801 suc2-Δ9 ent1::LEU2 ent2::HIS3 yap1801::HIS3 yap1802::LEU2 + pBW1376 (ent1<sup>NPF-</sup>, CEN)</i>                     | This study |
| BWY2601 | <i>Matα leu2-3 ura3-52 his3-Δ200 trp1-Δ901 lys2-801 suc2-Δ9 ent1::LEU2 ent2::HIS3 yap1801::HIS3 yap1802::LEU2 + pBW1381 (ent1<sup>UIM-/NPF-</sup>, CEN)</i>                | This study |
| BWY2602 | <i>Matα leu2-3 ura3-52 his3-Δ200 trp1-Δ901 lys2-801 suc2-Δ9 ent1::LEU2 ent2::HIS3 yap1801::HIS3 yap1802::LEU2 + pBW1382 (ent1<sup>UIM-/CBM-</sup>, CEN)</i>                | This study |
| BWY2603 | <i>Matα leu2-3 ura3-52 his3-Δ200 trp1-Δ901 lys2-801 suc2-Δ9 ent1::LEU2 ent2::HIS3 yap1801::HIS3 yap1802::LEU2 + pBW1383 (ent1<sup>NPF-/CBM-</sup>, CEN)</i>                | This study |
| BWY2604 | <i>Matα leu2-3 ura3-52 his3-Δ200 trp1-Δ901 lys2-801 suc2-Δ9 ent1::LEU2 ent2::HIS3 yap1801::HIS3 yap1802::LEU2 + pBW1359 (ent1<sup>ENTH/UIMs</sup>, CEN)</i>                | This study |
| BWY2605 | <i>Matα leu2-3 ura3-52 his3-Δ200 trp1-Δ901 lys2-801 suc2-Δ9 ent1::LEU2 ent2::HIS3 yap1801::HIS3 yap1802::LEU2 + pBW1360 (ent1<sup>ΔNPFs</sup>, CEN)</i>                    | This study |
| BWY2606 | <i>Matα leu2-3 ura3-52 his3-Δ200 trp1-Δ901 lys2-801 suc2-Δ9 ent1::LEU2 ent2::HIS3 yap1801::HIS3 yap1802::LEU2 PAN1-GFP-KAN + pBW0778 (ent1<sup>ENTH domain</sup>, CEN)</i> | This study |
| BWY2607 | <i>Matα leu2-3 ura3-52 his3-Δ200 trp1-Δ901 lys2-801 suc2-Δ9 ent1::LEU2 ent2::HIS3 yap1801::HIS3 yap1802::LEU2 PAN1-GFP-KAN + pBW1375 (ent1<sup>UIM-</sup>, CEN)</i>        | This study |
| BWY2608 | <i>Matα leu2-3 ura3-52 his3-Δ200 trp1-Δ901 lys2-801 suc2-Δ9 ent1::LEU2 ent2::HIS3 yap1801::HIS3 yap1802::LEU2 PAN1-GFP-KAN + pBW1376 (ent1<sup>NPF-</sup>, CEN)</i>        | This study |
| BWY2609 | <i>Matα leu2-3 ura3-52 his3-Δ200 trp1-Δ901 lys2-801 suc2-Δ9 ent1::LEU2 ent2::HIS3</i>                                                                                      | This study |

|         |                                                                                                                                                                                                                                                     |                   |
|---------|-----------------------------------------------------------------------------------------------------------------------------------------------------------------------------------------------------------------------------------------------------|-------------------|
| BWY2613 | <i>yap1801::HIS3 yap1802::LEU2 PAN1-GFP-KAN + pBW0387 (ent1<sup>CBM-</sup>, CEN)</i><br><i>Mata leu2-3 ura3-52 his3-Δ200 trp1-Δ901 lys2-801 suc2-Δ9 bar1 ent1::LEU2 ent2::HIS3 yap1801::HIS3 yap1802::LEU2 + pBW1376 (ent1<sup>NPF-</sup>, CEN)</i> | This study        |
| BWY2619 | <i>pan1::HIS3 (Longtine PCR vector) + pBW513 (PAN1 URA3 CEN)</i>                                                                                                                                                                                    | Laboratory strain |
| BWY2738 | <i>Mata leu2-3 ura3-52 his3-Δ200 trp1-Δ901 lys2-801 suc2-Δ9 bar1 ent1::LEU2 ent2::HIS3 yap1801::HIS3 yap1802::LEU2 + pBW0781 (high copy ent1C-term<sup>WT</sup>)</i>                                                                                | This study        |
| BWY2739 | <i>Mata leu2-3 ura3-52 his3-Δ200 trp1-Δ901 lys2-801 suc2-Δ9 bar1 ent1::LEU2 ent2::HIS3 yap1801::HIS3 yap1802::LEU2 + pBW1364 (high copy ent1C-term<sup>NPF-</sup>)</i>                                                                              | This study        |
| BWY2740 | <i>Mata leu2-3 ura3-52 his3-Δ200 trp1-Δ901 lys2-801 suc2-Δ9 bar1 ent1::LEU2 ent2::HIS3 yap1801::HIS3 yap1802::LEU2 + pBW1375 (ent1<sup>UIM-</sup>, CEN)</i>                                                                                         | This study        |
| BWY2741 | <i>Mata leu2-3 ura3-52 his3-Δ200 trp1-Δ901 lys2-801 suc2-Δ9 bar1 ent1::LEU2 ent2::HIS3 yap1801::HIS3 yap1802::LEU2 + pBW1376 (ent1<sup>NPF-</sup>, CEN)</i>                                                                                         | This study        |
| BWY2742 | <i>Mata leu2-3 ura3-52 his3-Δ200 trp1-Δ901 lys2-801 suc2-Δ9 bar1 ent1::LEU2 ent2::HIS3 yap1801::HIS3 yap1802::LEU2 + pBW0387 (ent1<sup>CBM-</sup>, CEN)</i>                                                                                         | This study        |
| BWY2743 | <i>Mata leu2-3 ura3-52 his3-Δ200 trp1-Δ901 lys2-801 suc2-Δ9 bar1 ent1::LEU2 ent2::HIS3 yap1801::HIS3 yap1802::LEU2 + pBW1381 (ent1<sup>UIM/NPF-</sup>, CEN)</i>                                                                                     | This study        |
| BWY2744 | <i>Mata leu2-3 ura3-52 his3-Δ200 trp1-Δ901 lys2-801 suc2-Δ9 bar1 ent1::LEU2 ent2::HIS3 yap1801::HIS3 yap1802::LEU2 + pBW1382 (ent1<sup>UIM/CBM-</sup>, CEN)</i>                                                                                     | This study        |
| BWY2745 | <i>Mata leu2-3 ura3-52 his3-Δ200 trp1-Δ901 lys2-801 suc2-Δ9 bar1 ent1::LEU2 ent2::HIS3 yap1801::HIS3 yap1802::LEU2 + pBW1383 (ent1<sup>NPF-/CBM-</sup>, CEN)</i>                                                                                    | This study        |
| BWY2746 | <i>Mata leu2-3 ura3-52 his3-Δ200 trp1-Δ901 lys2-801 suc2-Δ9 bar1 ent1::LEU2 ent2::HIS3 yap1801::HIS3 yap1802::LEU2 + pBW1448 (ent1<sup>lipid-</sup>, CEN)</i>                                                                                       | This study        |
| BWY2747 | <i>Mata leu2-3 ura3-52 his3-Δ200 trp1-Δ901</i>                                                                                                                                                                                                      | This study        |

|         |                                                                  |            |
|---------|------------------------------------------------------------------|------------|
|         | <i>lys2-801 suc2-Δ9 bar1 ent1::LEU2</i>                          |            |
|         | <i>ent2::HIS3 yap1801::HIS3 yap1802::LEU2 +</i>                  |            |
|         | <i>pBW1449 (ent1<sup>lipid-NPF-</sup>, CEN)</i>                  |            |
| BWY2748 | <i>pan1::HIS3 [parent = BWY2619] + pBW1443</i>                   | This study |
|         | <i>(Pan1-GFP, TRP1 CEN), 5FOA cured</i>                          |            |
| BWY2749 | <i>pan1::HIS3 [parent = BWY2619] + pBW1444</i>                   | This study |
|         | <i>(Pan1<sup>EH-</sup>-GFP, TRP1 CEN,) 5FOA cured</i>            |            |
| BWY2750 | <i>Mat<math>\alpha</math> leu2-3 ura3-52 his3-Δ200 trp1-Δ901</i> | This study |
|         | <i>lys2-801 suc2-Δ9 ent1::LEU2 ent2::HIS3</i>                    |            |
|         | <i>yap1801::HIS3 yap1802::LEU2 STE3-</i>                         |            |
|         | <i>GFP::KAN + pBW0053 (ENT2, CEN)</i>                            |            |

**Table 2 Plasmids used in this study**

| <b>Plasmid</b>     | <b>Description</b>                               | <b>Details</b>                                                                                   | <b>Source</b>                |
|--------------------|--------------------------------------------------|--------------------------------------------------------------------------------------------------|------------------------------|
| pBW0053            | <i>pENT2(URA3)</i>                               | pRS416::ENT2 (URA3, CEN)                                                                         | Laboratory plasmid           |
| pBW0054<br>pBW0387 | <i>pent1ΔCBM(TRP1)</i>                           | pRS414::ent1 (aa1-450) (TRP1, CEN)                                                               | (Baggett et al, 2003)        |
| pBW513             | <i>PAN1(URA3)</i>                                | pRS416::PAN1                                                                                     | Laboratory plasmid           |
| pBW0639            | <i>pSTE3-GFP (URA3)</i>                          | pRS316::STE3-GFP (URA, CEN)                                                                      | (Urbanowski and Piper, 2001) |
| pBW0768            | <i>pENT1(TRP1)</i>                               | pRS414::ENT1 (TRP1, CEN)                                                                         | Laboratory plasmid           |
| pBW0778            | <i>pent1ENTH<sup>domain only</sup> (TRP1)</i>    | pRS414::ent1 (aa1-151) (TRP1, CEN)                                                               | Laboratory plasmid           |
| pBW0781            | <i>pMET25 ent1C-term<sup>WT</sup> (URA)</i>      | pMET25.426::ent1 (aa154-454) (URA3, 2μ)                                                          | This study                   |
| pBW0985            | <i>pEDE1-RFP</i>                                 | pRS416::EDE1-RFP (URA, CEN)                                                                      | Laboratory plasmid           |
| pBW1015            | <i>pMET25 YAP1802 (URA3)</i>                     | pMET25.426::YAP1802 (URA3, 2μ)                                                                   | This study                   |
| pBW1016            | <i>pMET25 yap1802<sup>ANTH2</sup> (URA3)</i>     | pMET25.426::yap1802 (aa1-277) (URA3, 2μ)                                                         | This study                   |
| pBW1019            | <i>pMET25 yap1802Cterm<sup>WT</sup> (URA3)</i>   | pMET25.426::yap1802 (aa278-568) (URA3, 2μ)                                                       | This study                   |
| pBW1020            | <i>pMET25 yap1802<sup>ANTH+62aa</sup> (URA3)</i> | pMET25.426::yap1802 (aa1-339) (URA3, 2μ)                                                         | This study                   |
| pBW1344            | <i>pYAP1801(URA3)</i>                            | pRS416::YAP1801 (URA3, CEN)                                                                      | (Wendland and Emr 1998)      |
| pBW1345            | <i>pYAP1802(URA3)</i>                            | pRS416::YAP1802 (URA3, CEN)                                                                      | (Wendland and Emr 1998)      |
| pBW1359            | <i>pent1ENTH/UIMs (URA)</i>                      | pRS414::ent1 (aa1-229) (URA3, CEN)                                                               | Laboratory plasmid           |
| pBW1360            | <i>pent1ΔNPFs (URA)</i>                          | pRS414::ent1 (aa1-305) (URA3, CEN)                                                               | Laboratory plasmid           |
| pBW1361            | <i>pent1C-term<sup>WT</sup> (URA)</i>            | pRS316::ent1 (aa153-454) (URA, CEN)                                                              | This study                   |
| pBW1362            | <i>pMET25 ent1C-term<sup>NPF1-</sup> (URA)</i>   | pMET25.426::ent1(aa154-454) P307A and F308A mutations introduced by site directed mutagenesis in | This study                   |

|         |                                                   |                                                                                                                                                       |            |
|---------|---------------------------------------------------|-------------------------------------------------------------------------------------------------------------------------------------------------------|------------|
| pBW1363 | <i>pMET25 ent1C-term<sup>NPF2-</sup></i><br>(URA) | pBW0781 (URA3, 2 $\mu$ )<br>pMET25.426::ent1(aa154-454) P408A and F409A mutations introduced by site directed mutagenesis in pBW0781 (URA3, 2 $\mu$ ) | This study |
| pBW1364 | <i>pMET25 ent1C-term<sup>NPF-</sup></i><br>(URA)  | pMET25.426::ent1(aa154-454) P408A and F409A mutations introduced by site directed mutagenesis in pBW1362 (URA3, 2 $\mu$ )                             | This study |
| pBW1366 | <i>pMET25 ent1C-term<sup>UIM1-</sup></i><br>(URA) | pMET25.426::ent1(aa154-454) S175D mutation introduced by site directed mutagenesis in pBW0781 (URA3, 2 $\mu$ )                                        | This study |
| pBW1367 | <i>pMET25 ent1C-term<sup>UIM2-</sup></i><br>(URA) | pMET25.426::ent1(aa154-454) S201D mutation introduced by site directed mutagenesis in pBW0781 (URA3, 2 $\mu$ )                                        | This study |
| pBW1368 | <i>pMET25 ent1C-term<sup>UIM-</sup></i><br>(URA)  | pMET25.426::ent1(aa154-454) S175D mutation introduced by site directed mutagenesis in pBW1367 (URA3, 2 $\mu$ )                                        | This study |
| pBW1375 | <i>pENT1<sup>UIM-</sup></i> (TRP1)                | pRS414::ent1 S175D and S201D mutations introduced by site directed mutagenesis in pBW0768                                                             | This study |
| pBW1376 | <i>pENT1<sup>NPF-</sup></i> (TRP1)                | pRS414::ent1 P307A, F308A, P408A, and F409A mutations introduced by site directed mutagenesis in pBW0768                                              | This study |
| pBW1381 | <i>pENT1<sup>UIM-/NPF-</sup></i> (TRP1)           | pRS414::ent1 P307A, F308A, P408A, and F409A mutations introduced by site directed mutagenesis in pBW1375                                              | This study |
| pBW1382 | <i>pENT1<sup>UIM-/CBM-</sup></i> (TRP1)           | pRS414::ent1 S175D and S201D mutations introduced by site directed mutagenesis in pBW0387                                                             | This study |
| pBW1383 | <i>pENT1<sup>NPF-/CBM-</sup></i> (TRP1)           | pRS414::ent1 P307A, F308A, P408A, and F409A                                                                                                           | This study |



|         |                                            |                                                                                                                                                                                                |            |
|---------|--------------------------------------------|------------------------------------------------------------------------------------------------------------------------------------------------------------------------------------------------|------------|
| pBW1429 | <i>pede1<sup>EH-</sup>-RFP (URA3)</i>      | mutations introduced by site directed mutagenesis in pBW0387<br>pRS414:: <i>ede1</i> W56A, W176A, and W319A                                                                                    | This study |
| pBW1443 | <i>pPAN1-GFP (TRP1)</i>                    | mutations introduced by site directed mutagenesis in pBW985<br>C-terminal PAN1-GFP fragment from Longtine PCR plasmid subcloned into pRS414:: <i>PAN1</i> plasmid (XmnI-DraI genomic fragment) | This study |
| pBW1444 | <i>ppan1<sup>EH-</sup>-GFP (TRP1)</i>      | pRS414:: <i>pan1</i> W312A and W642A mutations introduced by site directed mutagenesis into pBW1443                                                                                            | This study |
| pBW1448 | <i>pENT1<sup>lipid-</sup> (TRP1)</i>       | pRS414:: <i>ent1</i> R62L and H72L mutations introduced by site-directed mutagenesis                                                                                                           | This study |
| pBW1449 | <i>pENT1<sup>lipid-/NPF-</sup> (TRP1)</i>  | pRS414:: <i>ent1</i> P307A, F308A, P408A, and F409A mutations introduced by ligating a BstEII fragment from pBW1376 into pBW1448                                                               | This study |
| pBW1453 | <i>pEnt1C-term<sup>WT</sup> (TRP1)</i>     | pMET25.4266:: <i>ent1</i> (aa154-454)                                                                                                                                                          | This study |
| pBW1454 | <i>pEnt1C-term<sup>UIM-</sup> (TRP1)</i>   | pMET25.4266:: <i>ent1</i> (aa154-454) S175D, S201D                                                                                                                                             | This study |
| pBW1455 | <i>pEnt1C-term<sup>NPF-</sup> (TRP1)</i>   | pMET25.4266:: <i>ent1</i> (aa154-454) P307A, F308A, P408A, and F409A                                                                                                                           | This study |
| pBW1466 | <i>GFP-Ent1 (TRP1)</i>                     | pGOGFP(414)::ENT1                                                                                                                                                                              | This study |
| pBW1468 | <i>GFP-Ent1<sup>NPF-/CBM-</sup> (TRP1)</i> | pGOGFP(414):: <i>ent1</i> P307A, F308A, P408A, and F409A; fragment subcloned from pBW1383 in place of similar fragment from pBW1466                                                            | This study |

## Supplemental Figure Legends

**Supplemental Figure S1. The *yap1801Δyap1802Δ* cells exhibit normal rates of endocytosis and growth at high temperature.** (A) *ent1Δent2Δ* containing the Ent1 ENTH domain (ENTH1) (BWY2595) and *yap1801Δyap1802Δ* cells (BWY2567) were transformed with a plasmid encoding for Ste3-GFP (pBW0639). Cells were grown at 30°C on selective media and visualized using live-cell imaging and confocal microscopy. (B) *ent1Δent2Δ* containing either full length *ENT1* (BWY2594) or the ENTH1 domain (BWY2595) and *yap1801Δyap1802Δ* cells (BWY2567) were grown on rich medium at 30°C or 37°C for three days.

**Supplemental Figure S2. The NPF motif-containing region of Ent1 is required for growth at high temperature in  $\Delta\Delta\Delta\Delta$  cells.** *ent1Δent2Δ* ( $\Delta\Delta$ ) or  $\Delta\Delta\Delta\Delta$  cells containing either full length Ent1 (BWY2594), an Ent1 C-terminal truncation (BWY2598, BWY2604 and BWY2605), or the ENTH1 domain (BWY2597) were grown on rich medium at 30°C, 33°C, 35°C or 37°C for three days.

**Supplemental Figure S3. NPF motifs are essential for the endocytosis function of the Ent1 C-terminus.** (A) Overexpression of the Ent1 C-terminus *in trans* restores viability at high temperature of  $\Delta\Delta\Delta\Delta$ +ENTH1 cells.  $\Delta\Delta\Delta\Delta$ +ENTH1 cells coexpressing the Ent1C-term<sup>WT</sup> at endogenous levels (endog Ent1C-term<sup>WT</sup>) (pBW1361) or overexpressed from a MET25 promoter (METpEnt1C-term<sup>WT</sup>) (pBW0781) were grown on rich media at 30°C or 37°C for 3 days. Endogenous levels of the Ent1 C-terminus were controlled using the endogenous *ENT1* promoter. (B) NPF motifs are required for viability of  $\Delta\Delta\Delta\Delta$ +ENTH1 cells at high temperatures.  $\Delta\Delta\Delta\Delta$ +ENTH1 cells (BWY2597) coexpressing the Ent1C-term<sup>WT</sup> (pBW0781), Ent1C-term<sup>UIM1-</sup> (pBW1366), Ent1C-term<sup>UIM2-</sup> (pBW1367), Ent1C-term<sup>UIM-</sup> (pBW1368), Ent1C-term<sup>NPF1-</sup> (pBW1362), Ent1C-term<sup>NPF2-</sup> (pBW1363), and the Ent1C-term<sup>NPF-</sup> (pBW1364) were tested for viability at high temperature. Cells were grown on rich media at 30°C and 37°C for 3 days. (C)

An immunoblot showing the Ent1 C-terminal point mutant constructs described above as detected by an antibody against the Ent1 C-terminus. (D) Wild type and mutant Ent1 C-terminal truncations localize to the plasma membrane in  $\Delta\Delta\Delta\Delta$ +ENTH1 cells. GFP N-terminal tagged Ent1 C-terminal fragments [(GFP-Ent1C-term<sup>WT</sup> (pBW1453), GFP-Ent1C-term<sup>UIM-</sup> (pBW1454), and GFP-Ent1C-term<sup>NPF-</sup> (pBW1455)] were expressed in  $\Delta\Delta\Delta\Delta$ +ENTH1 cells (BWY2597). Cells were grown on selective media and visualized using live-cell fluorescence microscopy. GFP-Ent1 was used as a localization control (pBW0054).

**Supplemental Figure S4. Ent1 NPF motifs are critical for endocytosis.** (A)  $\Delta\Delta\Delta\Delta$  cells expressing full length Ent1 (BWY2596) or the following mutants: Ent1 UIM motif (Ent1<sup>UIM-</sup>) (BWY2599), Ent1 NPF motif (Ent1<sup>NPF-</sup>) (BWY2600), Ent1 CBM (Ent1<sup>CBM-</sup>) (BWY2598), Ent1 UIM and NPF motif (Ent1<sup>UIM-/NPF-</sup>) (BWY2601), Ent1 UIM and CBM (Ent1<sup>UIM-/CBM-</sup>) (BWY2602), and Ent1 NPF and CBM (Ent1<sup>NPF-/CBM-</sup>) (BWY2603) were transformed with a Ste3-GFP plasmid (pBW0639), grown at 30°C and assessed for Ste3-GFP internalization by live-cell confocal microscopy. (B) Localization of GFP-Ent1<sup>WT</sup> (pBW1466) and GFP-Ent1<sup>NPF-/CBM-</sup> (pBW1468) in SEY6210 cells was visualized using the Marianas wide field epifluorescence microscope.

**Supplemental Figure S5. The NPF motifs are necessary for normal dynamics of the late scaffold protein Pan1.** (A) Pan1-GFP patches exhibit cortical localization in  $\Delta\Delta\Delta\Delta$  cells expressing Ent1 mutants. Single frames of a movie showing Pan1-GFP in  $\Delta\Delta\Delta\Delta$  cells expressing Ent1 (BWY2572) or the following mutants: Ent1 UIM motif (Ent1<sup>UIM-</sup>) (BWY2599) and Ent1 CBM motif (Ent1<sup>CBM-</sup>) (BWY2598). Pan1-GFP cortical patches in  $\Delta\Delta\Delta\Delta$  cells expressing Ent1 mutants localize to the plasma membrane and show the same type of movement as Pan1-GFP cortical patches in  $\Delta\Delta\Delta\Delta$  cells expressing wild type Ent1. Images were collected at one-second intervals and viewed for 2 min. (B) Moving Pan1-GFP patches in  $\Delta\Delta\Delta\Delta$ + Ent1<sup>NPF-</sup> cells exhibit a similar behavior to Pan1-GFP cortical patches in  $\Delta\Delta\Delta\Delta$ +Ent1 cells. Average lifetime  $\pm$  S.D. of dynamic Pan1-

GFP cortical patches in  $\Delta\Delta\Delta\Delta$ +Ent1,  $\Delta\Delta\Delta\Delta$ +Ent1<sup>UIM-</sup>,  $\Delta\Delta\Delta\Delta$ +Ent1<sup>NPF-</sup>, and  $\Delta\Delta\Delta\Delta$ +Ent1<sup>CBM-</sup> cells (n=15 patches, except for Ent1<sup>CBM-</sup>, n=12).

**Supplemental Figure S6. Ede1 requires its EH-domains for normal spatiotemporal dynamics.** (A) Ede1<sup>EH-</sup>-RFP patches localize to the cell cortex in WT and  $\Delta\Delta\Delta\Delta$ +Ent1 cells. Single frames of a movie showing Ede1-RFP (pBW0985) and Ede1<sup>EH-</sup>-RFP (pBW1429) cortical patches in WT (SEY6210) and  $\Delta\Delta\Delta\Delta$ +Ent1 (BWY2596) cells. (B) Ede1<sup>EH-</sup>-RFP patches exhibit higher maximum fluorescence intensity than Ede1-RFP cortical patches in wild type cells. The maximum fluorescence intensity of individual Ede1-RFP and Ede1<sup>EH-</sup>-RFP patches in WT and  $\Delta\Delta\Delta\Delta$ +Ent1 cells was analyzed using *Slide-Book 4.2*<sup>®</sup> software (n=100 patches for each strain). (D) Ede1 is required for endocytosis at 30°C in  $\Delta\Delta\Delta\Delta$  cells.  $\Delta\Delta\Delta\Delta$ +Ent1 (BWY2596) and  $5\Delta$ +Ent1 (BWY2572) cells were transformed with a Ste3-GFP plasmid (pBW0639). Cells were grown on selective media at 30°C and assessed for Ste3-GFP internalization using live-cell confocal microscopy.

### Supporting Movies

MovieS1. Real-time fluorescence microscopy of Pan1-GFP cortical patches in Wild Type cells. 750ms exposures taken every sec for 2 min, as described in Materials and Methods.

MovieS2. Real-time fluorescence microscopy of Pan1-GFP cortical patches in  $\Delta\Delta\Delta\Delta$ +Ent1 cells. 750ms exposures taken every sec for 2 min, as described in Materials and Methods.

MovieS3. Real-time fluorescence microscopy of Pan1-GFP cortical patches in  $\Delta\Delta\Delta\Delta$ +ENTH1 cells. 750ms exposures taken every sec for 2 min, as described in Materials and Methods.

MovieS4. Real-time fluorescence microscopy of Pan1-GFP cortical patches in  $\Delta\Delta\Delta\Delta$ +Ent1<sup>NPF-</sup> cells. 750ms exposures taken every sec for 2 min, as described in Materials and Methods.

MovieS5. Real-time fluorescence microscopy of Ede1-RFP cortical patches in *pan1* $\Delta$  cells. 750ms exposures taken every sec for 2 min, as described in Materials and Methods.

MovieS6. Real-time fluorescence microscopy of Ede1<sup>EH</sup>-RFP cortical patches in *pan1* $\Delta$  cells. 750ms exposures taken every sec for 2 min, as described in Materials and Methods.

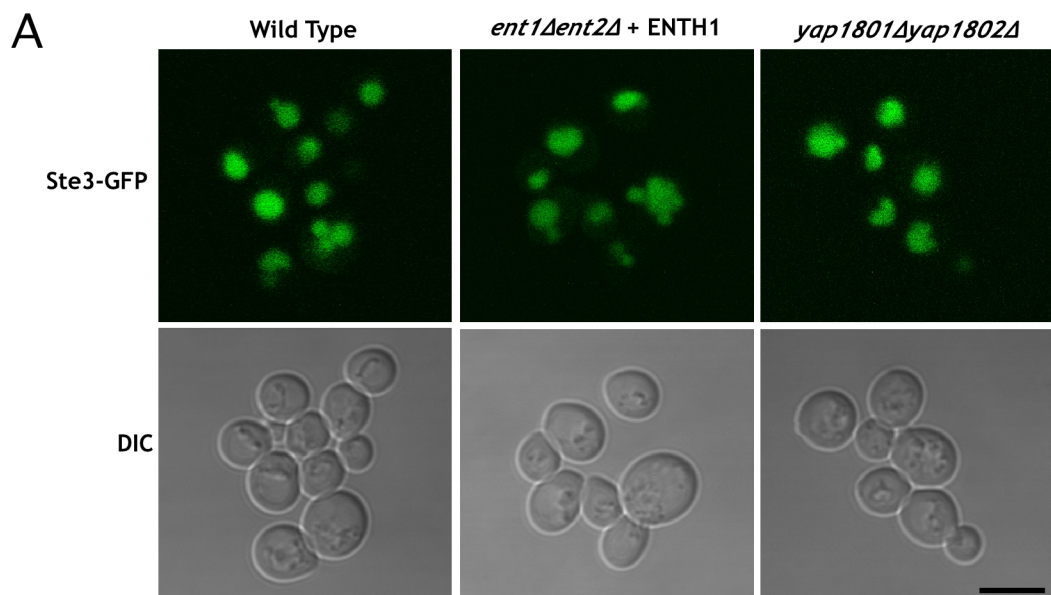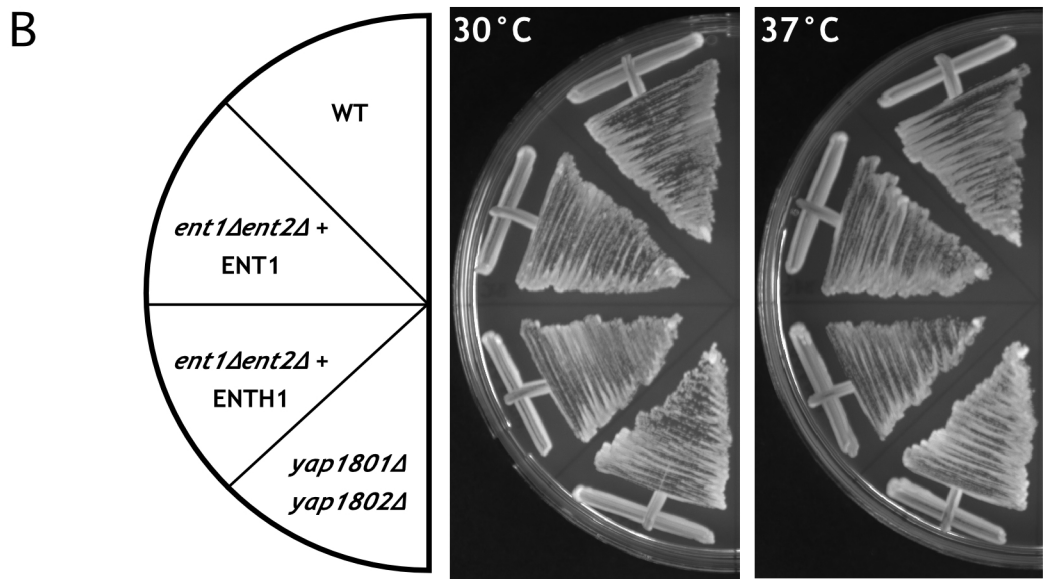

Supplemental Figure 2

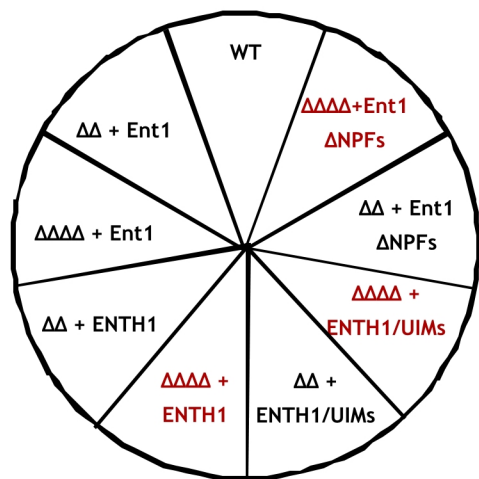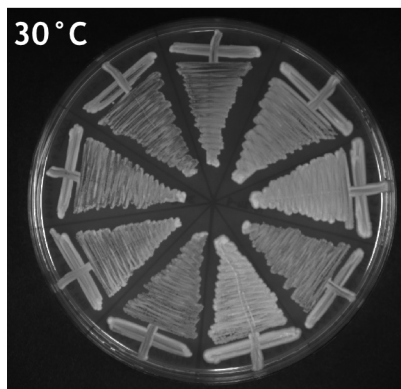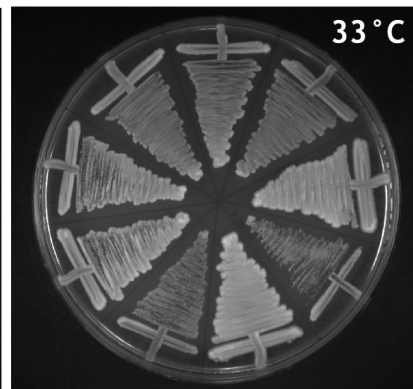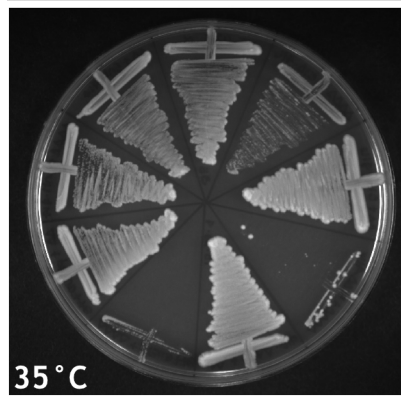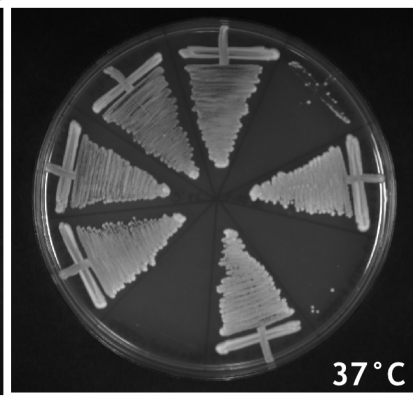

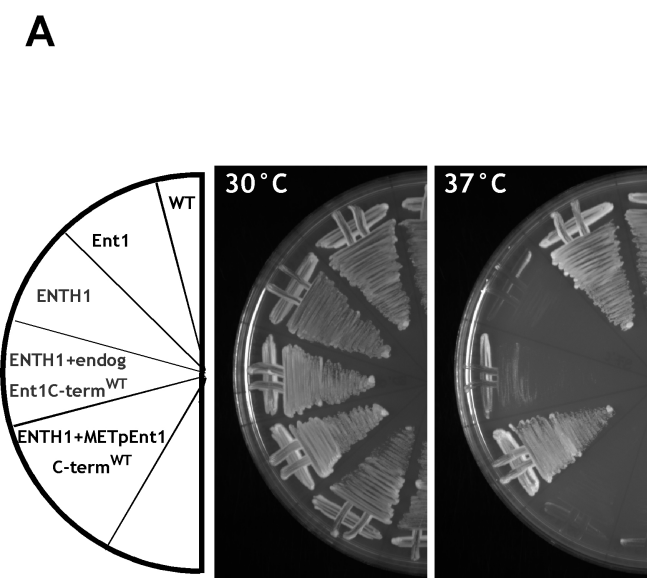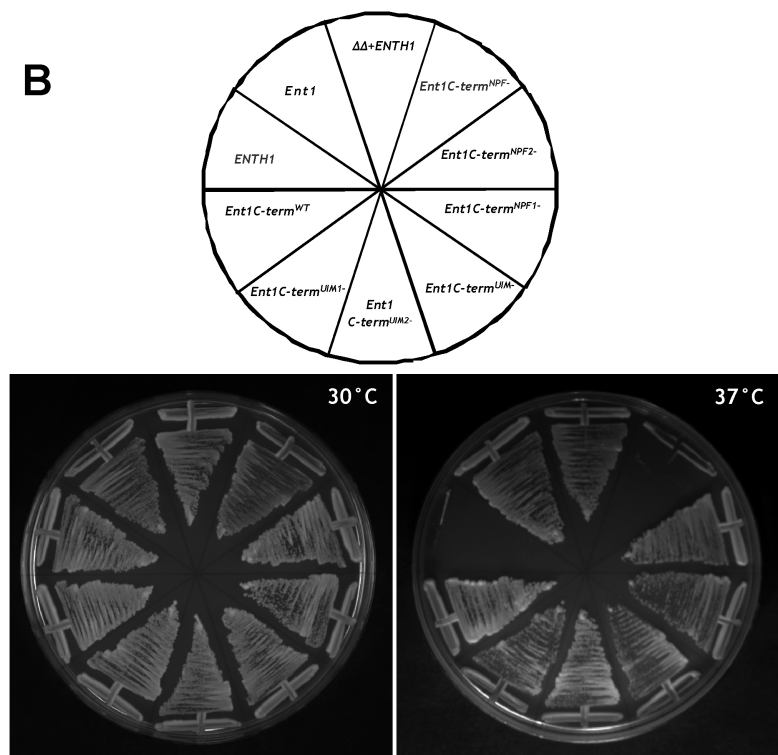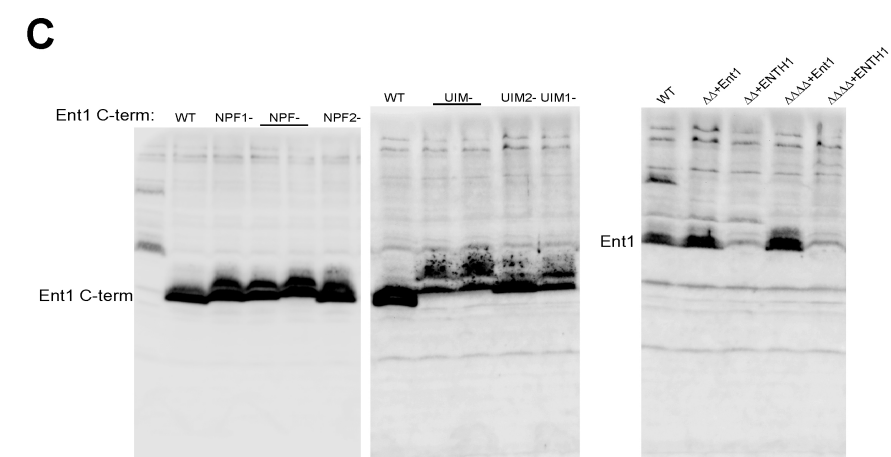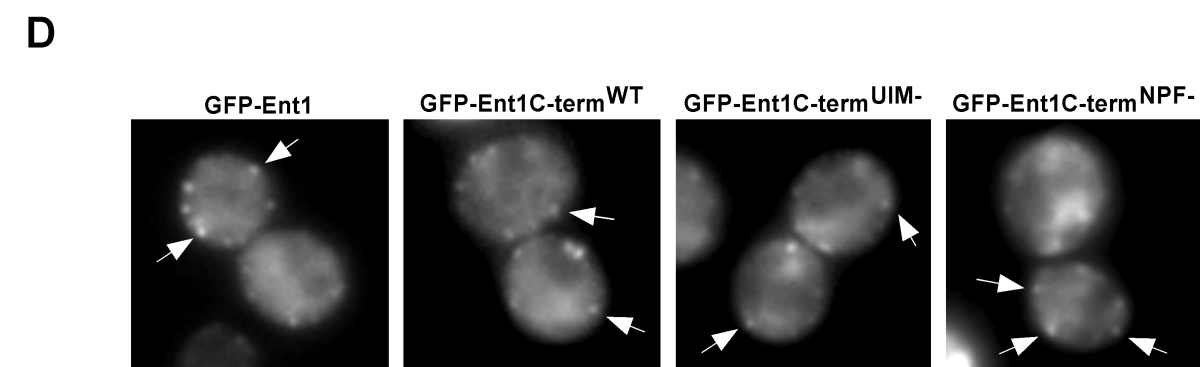



**A**

Full length Ent1 mutants: Ste3-GFP localization assay

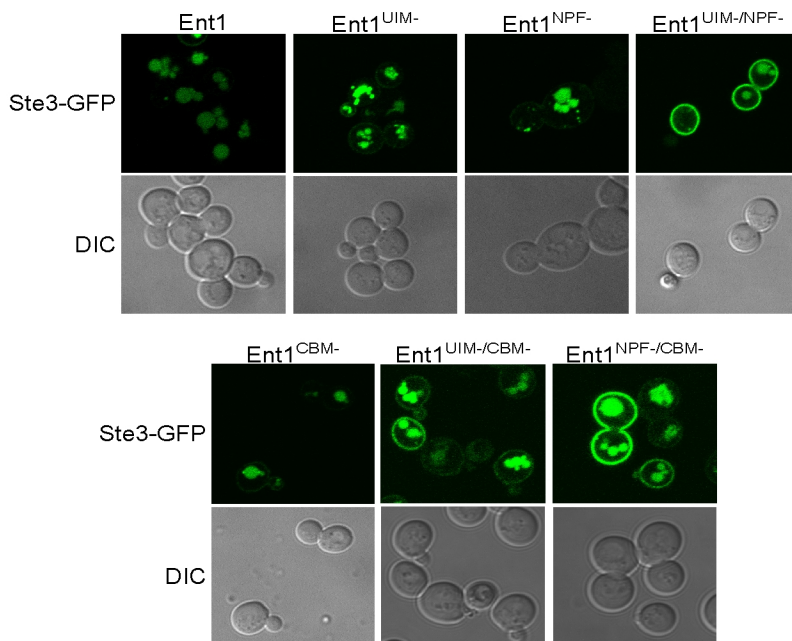**B**GFP-Ent1<sup>WT</sup>GFP-Ent1<sup>NPF-/CBM-</sup>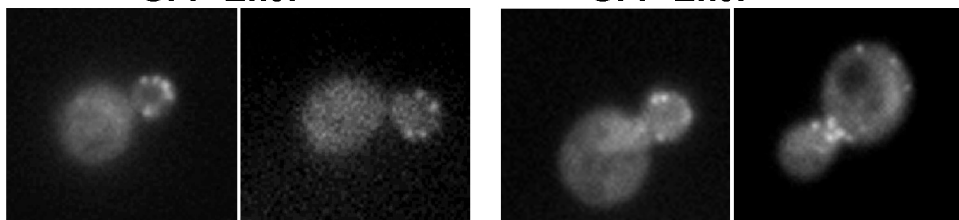

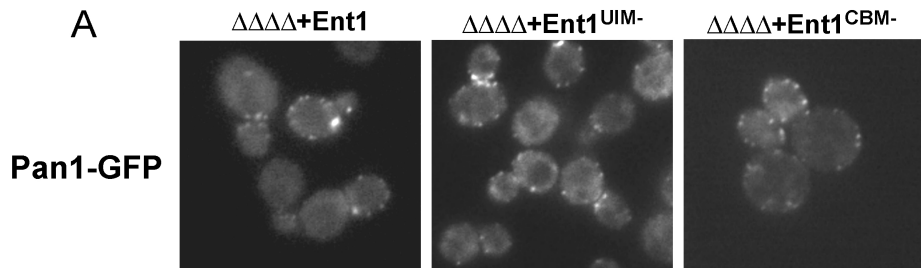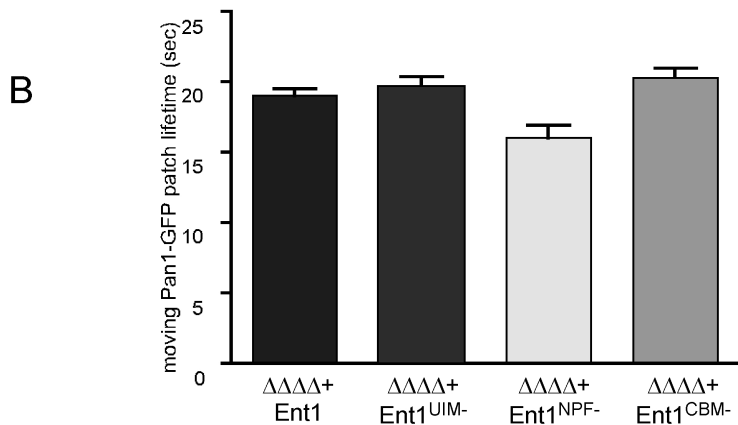

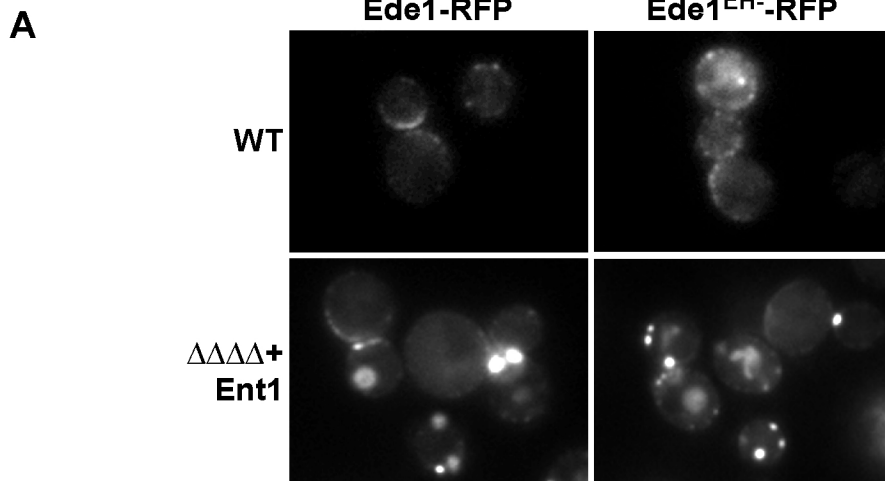

**B**

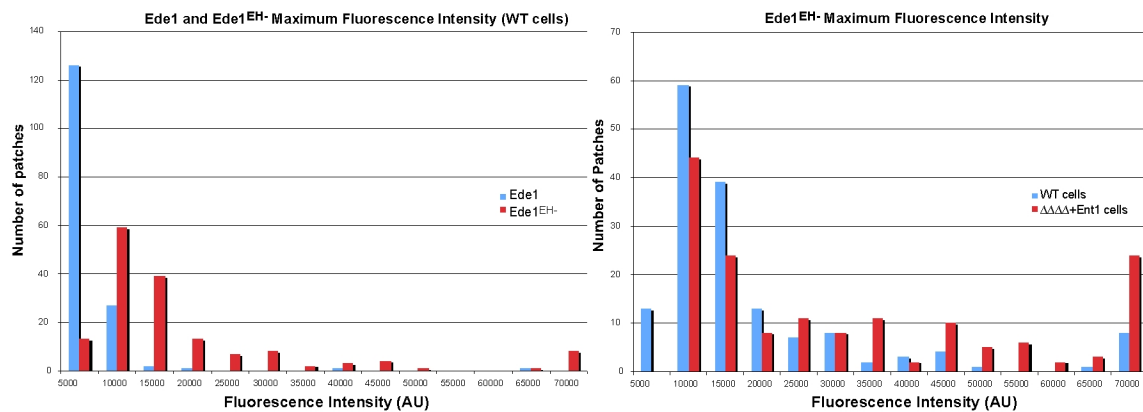

**C**

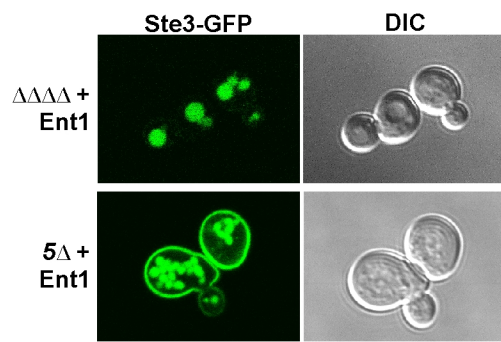

Supplement: E07-10-1019_1.pdf [file E07-10-1019_1.pdf]
